# Supplementary material for: Comparative Proteomics of Mouse Tears and Saliva: Evidence from Large Protein Families for Functional Adaptation
Source: MDPI journal article supplement (doi:10.3390/proteomes3030283), 2015-09-07
Supplement: s2 [file s2]

## Supplementary Materials

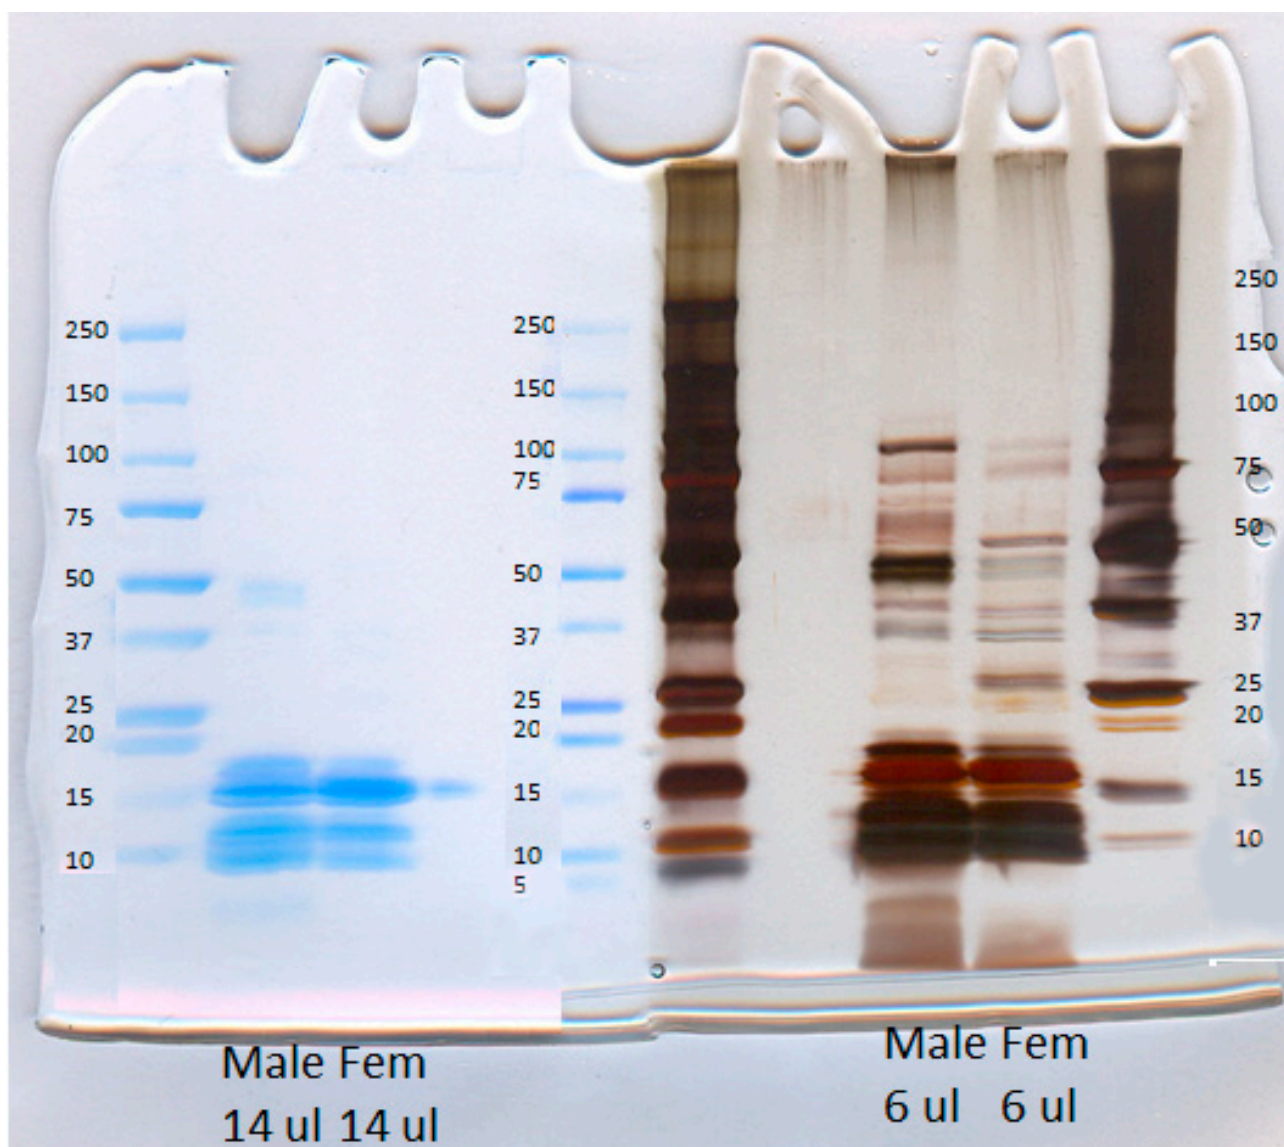

**Figure S1.** SDS one-dimension (1D) gel.

Spot 1 No ABP peptides found

Spot 13

A2 gicpaikedvhlflfgtpeeyvnyvek **YKDDPETLENTEK**LK icvdrtltkenkehaaafiekiessplc  
YKDDPETLENTEK  
YKDDPETLENTEK LK

BG2 cipffgvylgilsgr **IGLHTE**LAPFDPTVEEKEAFEKI **IQDCYEEGLK**AK tedmk **LMTTILFSSECR**syttk **EVLKNILV**kfskkl  
IGLHTE L A P F D P T V E E K E A F E K I I Q D C Y E E G L K A K L M T T I L F S S E C R E V L K N I L V k f s k k l t

No deamidated peptides found in either subunit

Spot A

A2 gicpaikedvhlflfgtpeeyvnyvek **YKDDPETLENTEK**LK icvdrtltkenkehaaafiekiESSPLC  
YKDDPETLENTEK  
YKDDPETLENTEK LK

BG2 cipffgvylgilsgr **IGLHTE**LAPFDPTVEEKEAFEKI **IQDCYEEGLK**AK TEDMKLMTTILFSSECRsyttk **EVLKNILV**kfskkl  
IGLHTE L A P F D P T V E E K E A F E K I I Q D C Y E E G L K A K T E D M K L M T T I L F S S E C R E V L K N I L V k f s k k l t

BG24 cvpffagyagvisgsrlwlyhelsafngtpk **ETVAYEKI** **IQDCYKEQGVK**sqtlepqilasiltvpeclqyyseetftkikdalkkisqh  
E T V A Y E K I I Q D C Y K E Q G V K s q t l e p q i l a s i l t v p e c l q y y s e e t f t k i k d a l k k i s q h

Spot B

A2 gicpaikedvhlflfgtpeeyvnyvek **YKDDPETLENTEK**LK icvdrtltk **ENKEHAAAFIEK**IESSPLC  
YKDDPETLENTEK E N K E H A A A F I E K I E S S P L C  
YKDDPETLENTEK L K

BG2 cipffgvylgilsgr **IGLHTE**LAPFDPTVEEKEAFEKI **IQDCYEEGLK**AK TEDMKLMTTILFSSECRsyttk **EVLKNILV**kfskkl  
IGLHTE L A P F D P T V E E K E A F E K I I Q D C Y E E G L K A K T E D M K L M T T I L F S S E C R E V L K N I L V k f s k k l t

BG24 cvpffagyagvisgsrlwlyhelsafngtpk **ETVAYEKI** **IQDCYKEQGVK**sqtlepqilasiltvpeclqyyseetftkikdalkkisqh  
E T V A Y E K I I Q D C Y K E Q G V K s q t l e p q i l a s i l t v p e c l q y y s e e t f t k i k d a l k k i s q h

Spot C

A2 **GICPAIK**edvhlflfgtpeeyvnyvek **YKDDPETLENTEK**LK icvdrtltk **ENKEHAAAFIEK**IESSPLC  
YKDDPETLENTEK E N K E H A A A F I E K I E S S P L C  
YKDDPETLENTEK L K

BG2 cipffgvylgilsgr **IGLHTE**LAPFDPTVEEKEAFEKI **IQDCYEEGLK**AK TEDMKLMTTILFSSECRsyttk **EVLKNILV**kfskkl  
IGLHTE L A P F D P T V E E K E A F E K I I Q D C Y E E G L K A K T E D M K L M T T I L F S S E C R E V L K N I L V k f s k k l t

Both versions of YKDDPETLENTEK(LK) (i.e. deamidated or not) were found

Spot D

A2 **GICPAIK**edvhlflfgtpeeyvnyvek **YKDDPETLENTEK**LK icvdr **TLTKEN**KEHAAAFIEKIESSPLC  
D D P E T L E N T E K E N K E H A A A F I E K I E S S P L C  
YKDDPETLENTEK E N K E H A A A F I E K I E S S P L C  
YKDDPETLENTEK L K (only this one was deamidated)

BG2 cipffgvylgilsgr **IGLHTE**LAPFDPTVEEKEAFEKI **IQDCYEEGLK**AK TEDMKLMTTILFSSECRsyttk **EVLKNILV**kfskkl  
IGLHTE L A P F D P T V E E K E A F E K I I Q D C Y E E G L K A K T E D M K L M T T I L F S S E C R E V L K N I L V k f s k k l t

BG24 cvpffagyagvisgsrlwlyhelsafngtpk **ETVAYEKI** **IQDCYKEQGVK**sqtlepqilasiltvpeclqyyseetftkikdalkkisqh  
E T V A Y E K I I Q D C Y K E Q G V K s q t l e p q i l a s i l t v p e c l q y y s e e t f t k i k d a l k k i s q h

Spot E

A2 gicpaikedvhlflfgtpeeyvnyvek **YKDDPETLENTEK**LK icvdrtltkenkehaaafiek **IESSPLC**  
YKDDPETLENTEK

BG2 cipffgvylgilsgr **IGLHTE**LAPFDPTVEEKEAFEKI **IQDCYEEGLK**AK TEDMKLMTTILFSSECRsyttk **EVLKNILV**kfskkl  
IGLHTE L A P F D P T V E E K E A F E K I I Q D C Y E E G L K A K T E D M K L M T T I L F S S E C R E V L K N I L V k f s k k l t

Figure S2. Cont.

Spot F

A2 gicpaikedvhlflfgtpeeyvnyvekYKDDPETLE<sup>\*</sup>TEK<sup>\*</sup>LKicvdrtltkENKEHAAAFIEKIESSPLC  
 YKDDPETLE<sup>\*</sup>TEK ENKEHAAAFIEK (not found deamidated)  
 YKDDPETLE<sup>\*</sup>TEK<sup>\*</sup>LK (both deamidated and not)

BG2 cipffgvylgilsgr<sup>\*</sup>IGLHTE<sup>\*</sup>LAPFDPTVEEKEAFEKI<sup>\*</sup>QDCYEEEG<sup>\*</sup>LKAKTEDMKLMTTILFSSECR<sup>\*</sup>syytkevlknilvkfskkl<sup>\*</sup>t  
 I<sup>\*</sup>QDCYEEGLK  
 I<sup>\*</sup>QDCYEEGLKAK (no deamidated peptides found)

A20 gicpaikedvrlflngtseeyveyvk<sup>\*</sup>QYKDDPVILE<sup>\*</sup>NTAKIK<sup>\*</sup>Q<sup>\*</sup>CVDSTL<sup>\*</sup>TEEDKIHATTFIEKIEAS<sup>\*</sup>PIC  
 QYKDDPVILE<sup>\*</sup>NTAK  
 IK<sup>\*</sup>Q<sup>\*</sup>CVDSTL<sup>\*</sup>TEEDKIHATTFIEK

No deamidated peptides of A20 were found

**Figure S2.** Peptides found to be deamidated (and those not deamidated). Excised spots showing ABPA2 and ABPBG2 subunits have Asn (green highlighting) and Gln (blue highlighting) residues, some of which have been deamidated (red highlighting). Asterisks identify deamidatable Asn and Gln residues. Capital letters with (yellow highlighting) identify peptides found.
